# Supplementary material for: Global biogeography of N 2 -fixing microbes: nifH amplicon database and analytics workflow
Source: Copernicus journal article supplement (doi:10.5194/essd-17-393-2025), 2025-02-04
Supplement: Supplementary file 1 [file essd-17-393-2025-supplement.zip]

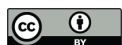

*Supplement of*

## **Global biogeography of N<sub>2</sub>-fixing microbes: *nifH* amplicon database and analytics workflow**

**Michael Morando et al.**

*Correspondence to:* Kendra A. Turk-Kubo (kturk@ucsc.edu)

- [essd-17-393-2025-supplement-title-page.pdf](#)
- [Table S1.csv](#)

The copyright of individual parts of the supplement might differ from the article licence.
